# Supplementary material
Source: PubMed Central journal article supplement (PMC2889101)
Supplement: 0913835107_pnas.200913835SI.pdf [file 0913835107_pnas.200913835SI.pdf]

# Supporting Information

Wang et al. 10.1073/pnas.0913835107

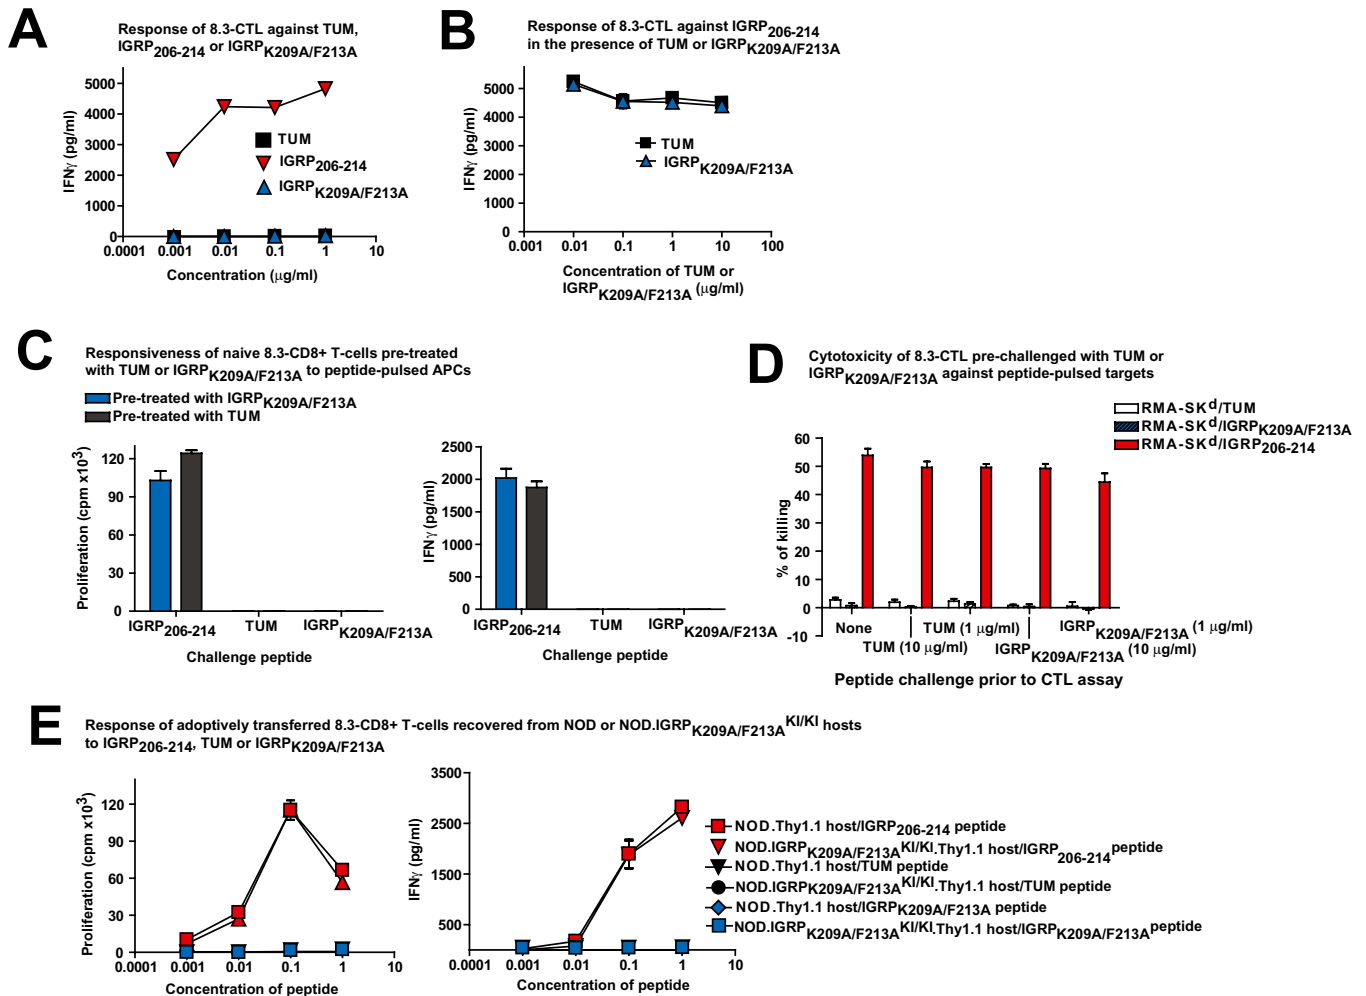

**Fig. S1.** The IGRP<sub>K209A/F213A</sub> epitope is not recognized by, and does not alter the functional responsiveness of IGRP<sub>206-214</sub>-reactive 8.3-CD8<sup>+</sup> T cells either in vitro or in vivo. (A) Differentiated 8.3-CD8<sup>+</sup> T cells secrete IFN<sub>γ</sub> in response to splenocytes pulsed with IGRP<sub>206-214</sub> but not IGRP<sub>K209A/F213A</sub>. IFN<sub>γ</sub> content in the supernatants was measured at 24 h of culture. (B) IGRP<sub>K209A/F213A</sub> does not inhibit the responsiveness of differentiated 8.3-CD8<sup>+</sup> T cells to IGRP<sub>206-214</sub>. Differentiated 8.3-CD8<sup>+</sup> T cells were cultured with IGRP<sub>206-214</sub>-pulsed (0.1 μg/ml) splenocytes in the presence of various concentrations of TUM or IGRP<sub>K209A/F213A</sub> for 24 h and the supernatants collected to measure the IFN<sub>γ</sub> concentration. (C) Pretreatment of naive 8.3-CD8<sup>+</sup> T cells with IGRP<sub>K209A/F213A</sub> (or TUM) peptide does not alter their subsequent responsiveness to IGRP<sub>206-214</sub>. Naive splenic 8.3-CD8<sup>+</sup> T cells were preincubated with 10 μg/ml IGRP<sub>K209A/F213A</sub> or TUM for 2 days. CD8<sup>+</sup> T cells were then purified and tested for their ability to proliferate (*Left*) and secrete IFN<sub>γ</sub> (*Right*) in response to bone marrow-derived dendritic cells pulsed with 0.1 μg/ml IGRP<sub>206-214</sub>, TUM, or IGRP<sub>K209A/F213A</sub>. (D) Differentiated 8.3-CD8<sup>+</sup> T cells cannot kill targets pulsed with IGRP<sub>K209A/F213A</sub>, and preincubation of 8.3-CD8<sup>+</sup> CTL with IGRP<sub>K209A/F213A</sub> does not inhibit their cytotoxic activity against RMA-SK<sup>d</sup> targets pulsed with IGRP<sub>206-214</sub>. The 8.3-CD8<sup>+</sup> CTLs were preincubated with bone marrow-derived dendritic cells pulsed with 1 or 10 μg/ml of either TUM or IGRP<sub>K209A/F213A</sub> for 24 h, purified away from DCs using mAb-coated magnetic beads, and used as effectors in a standard <sup>51</sup>Cr-release assay using RMA-SK<sup>d</sup> cells pulsed with 10 μg/ml of IGRP<sub>206-214</sub>, TUM or IGRP<sub>K209A/F213A</sub> at an 8:1 effector:target ratio in triplicate wells. Percentage of killing was calculated as (<sup>51</sup>Cr in test well – spontaneous release)/(maximum release – spontaneous release) × 100. (E) Encounter of IGRP<sub>K209A/F213A</sub> by 8.3-CD8<sup>+</sup> T cells in vivo does not impair their functional responsiveness to IGRP<sub>206-214</sub> ex vivo. Ten million 8.3-CD8<sup>+</sup> T cells (Thy1.2<sup>+</sup>) were adoptively transferred into NOD.Thy1.1 or NOD.IGRP<sub>K209A/F213A</sub><sup>KI/KI</sup>.Thy1.1 hosts (8- to 12-weeks old). Seven days posttransfer, Thy1.2<sup>+</sup> 8.3-CD8<sup>+</sup> T cells were isolated from the spleen and lymph nodes of the hosts using antibody-coated magnetic beads and tested for proliferation and IFN<sub>γ</sub> against irradiated NOD splenocytes pulsed with TUM, IGRP<sub>206-214</sub>, or IGRP<sub>K209A/F213A</sub>. Data correspond to mean ± SE of triplicate cultures.

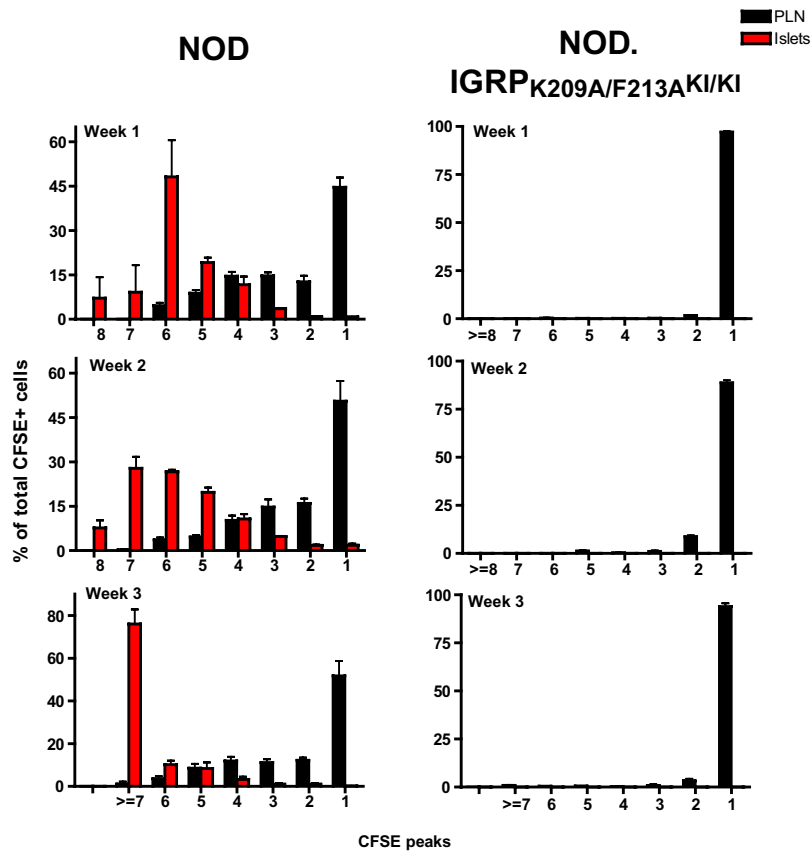

**Fig. 52.** Recruitment of naive 8.3-CD8<sup>+</sup> T cells into the pancreatic islets of NOD mice is preceded by antigen-induced proliferation in the PLN. Recruitment and proliferation of adoptively transferred naive 8.3-CD8<sup>+</sup> T cells ( $10^7$ ) from 8.3-NOD.Thy1.1 donor mice in the lymphoid organs and islets of insulinitic NOD and NOD.IGRP<sub>K209A/F213A</sub><sup>KI/KI</sup> hosts 1, 2, and 3 weeks after transfer. Histograms correspond to percentages of cells within each CFSE peak (i.e., from Fig. 2C) (mean  $\pm$  SEM). Data correspond to three to six experiments for each time point and host type.

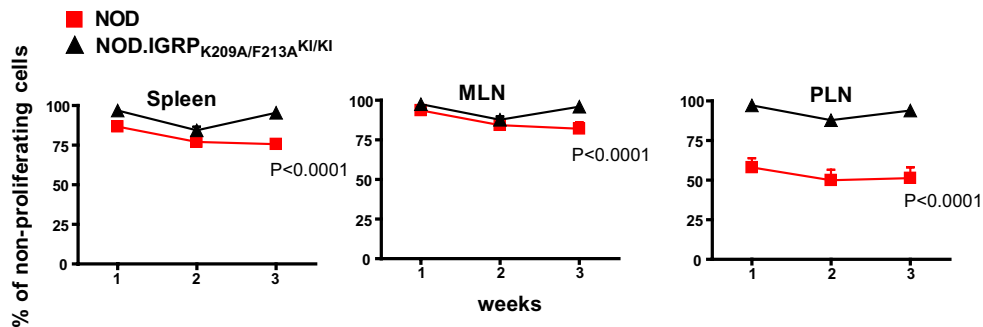

**Fig. 53.** Naive 8.3-CD8<sup>+</sup> T cells fail to proliferate in the PLN of NOD.IGRP<sup>KI/KI</sup> hosts. Proliferation of adoptively transferred naive 8.3-CD8<sup>+</sup> T cells ( $10^7$ ) from 8.3-NOD.Thy1.1 donor mice in the lymphoid organs of insulinitic NOD and NOD.IGRP<sub>K209A/F213A</sub><sup>KI/KI</sup> hosts 1, 2, and 3 weeks after transfer. Histograms correspond to percentages of nonproliferating CFSE<sup>+</sup> cells (mean  $\pm$  SEM). Data correspond to three to six experiments for each time point and host type. *P* values shown were obtained with two-way ANOVA. Values corresponding to the 1-week and 3-week time points in the spleen and MLNs were also statistically different as measured with Mann-Whitney *U*-test (spleen: *P* = 0.0011 and 0.0029, respectively; and MLN: *P* = 0.002 and 0.0343, respectively).
